# Supplementary material
Source: publisher site journal article supplement (https://www.dovepress.com/get_supplementary_file.php?f=355435.docx)
Supplement: Supplementary file 1 [file get_supplementary_file.php]

|  | Univariate Analysis | | |  |  | Multivariate Analysis | | |
| --- | --- | --- | --- | --- | --- | --- | --- | --- |
| Gene | HR | 95% CI | *P* |  | Coef | HR | 95% CI | *P* |
| AOC1 | 0.88 | 0.77-0.99 | 0.035 |  | -0.158 | 0.85 | 0.75-0.98 | 0.020 |
| DDC | 1.19 | 1.03-1.38 | 0.021 |  | 0.179 | 1.20 | 1.02-1.41 | 0.031 |
| LINC01436 | 1.30 | 1.02-1.65 | 0.031 |  | 0.230 | 1.26 | 1.00-1.58 | 0.049 |
| ORM1 | 1.10 | 1.02-1.18 | 0.011 |  | 0.162 | 1.18 | 1.08-1.27 | <0.001 |
| PAH | 0.83 | 0.70-0.99 | 0.033 |  | -0.226 | 0.80 | 0.67-0.95 | 0.011 |

**Table S1. Univariate and multivariate analyses of biochemical recurrence-related genes**

HR hazard ratio, CI confident interval, Coef coefficient.


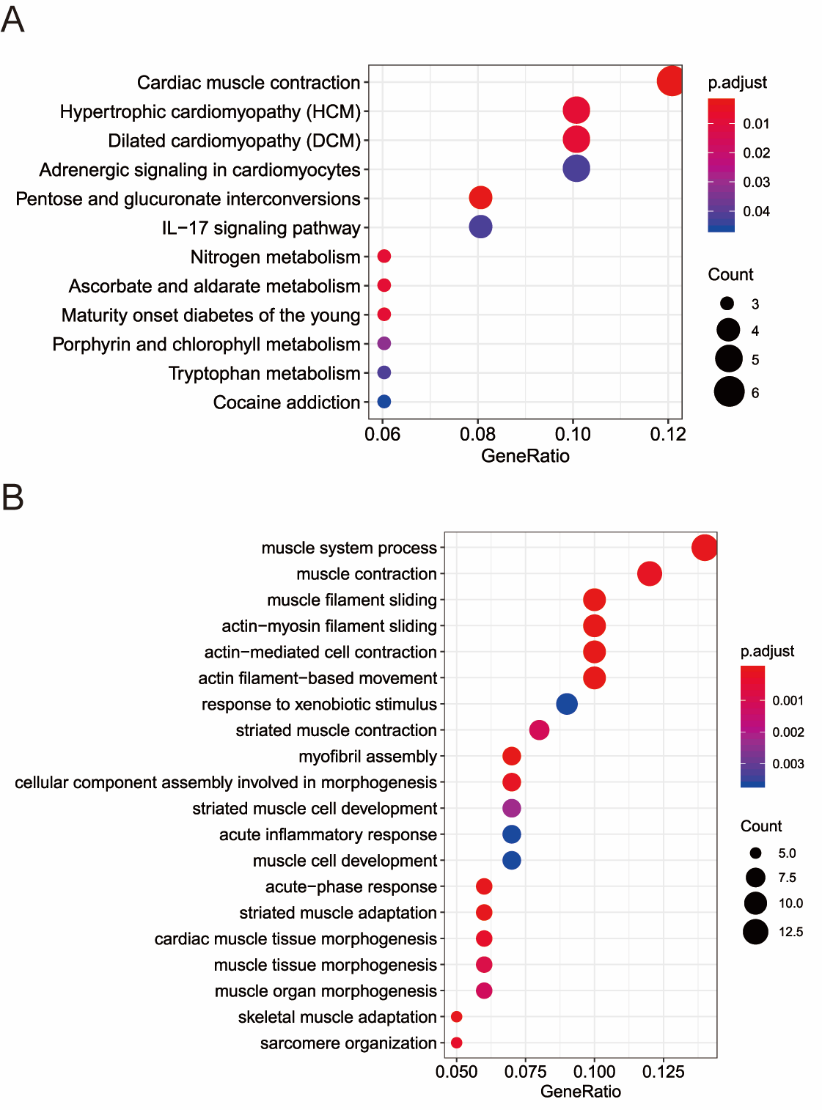


**Figure S1 |** Pathway enrichment analyses of DEGs.

**Figure S1** | Pathway enrichment analyses of DEGs. (A) KEGG pathway enrichment analysis of DEGs. (B) GO_BP enrichment analysis of DEGs.
